# Supplementary material
Source: PubMed Central journal article supplement (PMC8601217)
Supplement: jcm.01229-21-s0001.pdf [file jcm.01229-21-s0001.pdf]

**Supplementary Table S1: Overview of *Aspergillus* tests performed and outcomes for proven or probable CAPA patients positive for serum GM, BDG, or *Aspergillus* PCR**

| BAL <i>Aspergillus</i> culture | BAL GM index ≥ 1.0 | BAL <i>Aspergillus</i> PCR | NBL <i>Aspergillus</i> culture | NBL GM index ≥ 4.5 | NBL <i>Aspergillus</i> PCR | BA <i>Aspergillus</i> culture | sputum <i>Aspergillus</i> culture | serum GM index > 0.5 | serum BDG ≥ 80 pg/mL | serum <i>Aspergillus</i> PCR | Antifungal treatment | Length of stay in ICU | Patient status        |
|--------------------------------|--------------------|----------------------------|--------------------------------|--------------------|----------------------------|-------------------------------|-----------------------------------|----------------------|----------------------|------------------------------|----------------------|-----------------------|-----------------------|
| ●                              | ●                  | ●                          |                                |                    |                            |                               |                                   | ○                    | ●                    | ○                            | VRC                  | 24 days               | deceased              |
| ●                              | ○                  | ●                          |                                |                    |                            |                               |                                   | ○                    | ●                    | ○                            | CAS                  | 13 days               | deceased              |
| ●                              | ○                  | ●                          |                                |                    |                            |                               |                                   | ○                    | ●                    | ○                            | none <sup>a</sup>    | 9 days                | deceased              |
|                                |                    |                            |                                |                    |                            | ●                             |                                   | ●                    | ●                    | ●                            | VRC                  | 18 days               | deceased              |
|                                |                    |                            |                                |                    |                            | ●                             |                                   | ●                    | ●                    | ●                            | AMB                  | 14 days               | deceased              |
|                                |                    |                            |                                |                    |                            |                               |                                   | ●                    | ●                    | ○                            | none <sup>a</sup>    | 7 days                | deceased              |
|                                |                    |                            |                                |                    |                            | ●                             |                                   | ●                    | ●                    | ○                            | VRC                  | 30 days               | deceased              |
|                                |                    |                            | ● ○                            | ●                  | ●                          |                               |                                   | ●                    | ●                    | ●                            | VRC                  | 18 days               | deceased              |
|                                |                    |                            | ●                              | ● ○                | ● ○                        |                               |                                   | ○                    | ●                    | ● ○                          | VRC + AMB            | 61 days               | deceased              |
|                                |                    |                            | ● ○                            | ●                  | ●                          |                               |                                   | ●                    | ●                    | ●                            | AMB                  | 29 days               | deceased              |
|                                |                    |                            | ●                              | ●                  |                            |                               |                                   | ●                    | ○                    |                              | VRC + AFG            | 17 days               | deceased <sup>b</sup> |
| ○                              | ○                  |                            |                                |                    |                            | ○                             | ○                                 | ● ○                  | ○                    |                              | none                 | 16 days               | alive <sup>c</sup>    |

Legend: ● positive test outcome; ○ negative test outcome

<sup>a</sup>antifungal treatment was not started as patient deceased prior to test outcome; <sup>b</sup>proven CAPA case diagnosed with positive *Aspergillus* culture performed on lung tissue obtained through biopsy; <sup>c</sup>positive serum GM was deemed false positive by clinicians, as all consecutive *Aspergillus* tests performed, including serum GM, were negative

Abbreviations: AFG – anidulafungin; AMB – amphotericin B; CAS – caspofungin; ODI – optical density index; VRC – voriconazole
