# Supplementary material
Source: PubMed Central journal article supplement (PMC8601217)
Supplement: jcm.01229-21-s0002.pdf [file jcm.01229-21-s0002.pdf]

**Supplementary Table S2: Overview of *Aspergillus* tests performed and outcomes for proven/probable CAPA patients without antifungal treatment**

| BAL <i>Aspergillus</i> culture | BAL GM index $\geq 1.0$ | BAL <i>Aspergillus</i> PCR | NBL <i>Aspergillus</i> culture | NBL GM index $\geq 4.5$ | NBL <i>Aspergillus</i> PCR | BA <i>Aspergillus</i> culture | sputum <i>Aspergillus</i> culture | serum GM index $> 0.5$ | serum BDG $\geq 80$ pg/mL | serum <i>Aspergillus</i> PCR | Time between ICU admission and CAPA diagnosis | Time between ICU admission and ICU discharge | Patient status     |
|--------------------------------|-------------------------|----------------------------|--------------------------------|-------------------------|----------------------------|-------------------------------|-----------------------------------|------------------------|---------------------------|------------------------------|-----------------------------------------------|----------------------------------------------|--------------------|
| ○                              | ●                       |                            |                                |                         |                            |                               |                                   |                        |                           |                              | 0 days                                        | 0 days                                       | deceased           |
| ●                              | ○                       | ○                          |                                |                         |                            |                               |                                   | ○                      |                           | ○                            | 7 days                                        | 16 days                                      | alive <sup>a</sup> |
| ●                              | ○                       | ○                          |                                |                         |                            |                               |                                   | ○                      | ○                         | ○                            | 1 day                                         | 1 day                                        | alive <sup>b</sup> |
| ●                              | ○                       | ●                          |                                |                         |                            |                               |                                   |                        |                           |                              | 6 days                                        | 18 days                                      | alive <sup>a</sup> |
| ●                              | ○                       | ●                          |                                |                         |                            |                               |                                   | ○                      | ●                         | ○                            | 3 days                                        | 9 days                                       | deceased           |
| ○                              | ●                       | ●                          |                                |                         |                            |                               |                                   | ○                      | ○                         | ○                            | 25 days                                       | 91 days                                      | alive <sup>a</sup> |
| ●                              | ○                       | ○                          |                                |                         |                            |                               |                                   |                        |                           |                              | 18 days                                       | 29 days                                      | deceased           |
|                                |                         |                            |                                |                         |                            |                               |                                   | ●                      | ●                         | ○                            | 7 days                                        | 7 days                                       | deceased           |
| ●                              | ●                       |                            |                                |                         |                            |                               |                                   |                        |                           |                              | 7 days                                        | 8 days                                       | deceased           |
| ○                              | ○                       |                            |                                |                         |                            | ○                             | ○                                 | ●                      | ○                         | ○                            | 4 days                                        | 16 days                                      | alive <sup>c</sup> |
| ●                              | ○                       |                            |                                |                         |                            | ●                             | ○                                 | ○                      |                           |                              | 9 days                                        | 15 days                                      | alive <sup>d</sup> |

Legend: ● positive test outcome; ○ negative test outcome

<sup>a</sup>unclear why patient was not treated with antifungal therapy; <sup>b</sup>in patients with chronic obstructive pulmonary disease or chronic respiratory disease, the PCR or culture results should be confirmed by GM testing to rule out colonization or chronic aspergillosis, in addition to clinical improvement, invasive aspergillosis was deemed unlikely; <sup>c</sup>positive serum GM was deemed false positive by clinicians, as all consecutive *Aspergillus* tests performed, including serum GM, were negative; <sup>d</sup>antifungal therapy was not deemed necessary by clinicians, as patient improved clinically and was negative for BAL GM, patient was considered *Aspergillus* colonized by clinicians.
