# Supplementary material
Source: PubMed Central journal article supplement (PMC8601217)
Supplement: jcm.01229-21-s0003.pdf [file jcm.01229-21-s0003.pdf]

### Supplementary Table S3: STROBE statement

|                           | Item | Recommendation                                                                                                                                                      | Comment                                                                                               |
|---------------------------|------|---------------------------------------------------------------------------------------------------------------------------------------------------------------------|-------------------------------------------------------------------------------------------------------|
| <b>Title and abstract</b> | 1    | (a) Indicate the study's design with a commonly used term in the title or the abstract                                                                              | (a) Indicated in "Abstract"                                                                           |
|                           |      | (b) Provide in the abstract an informative and balanced summary of what was done and what was found                                                                 | (b) Provided in "Abstract"                                                                            |
| <b>Introduction</b>       |      |                                                                                                                                                                     |                                                                                                       |
| Background/<br>rationale  | 2    | Explain the scientific background and rationale for the investigation being reported                                                                                | Explained in "Introduction" paragraphs 1 and 2                                                        |
| Objectives                | 3    | State specific objectives, including any prespecified hypotheses                                                                                                    | Stated in "Introduction" paragraph 3                                                                  |
| <b>Methods</b>            |      |                                                                                                                                                                     |                                                                                                       |
| Study design              | 4    | Present key elements of study design early in the paper                                                                                                             | Presented in "Methods", subsection "Study design" and "Participants"                                  |
| Setting                   | 5    | Describe the setting, locations, and relevant dates, including periods of recruitment, exposure, follow-up, and data collection                                     | Described in "Methods", subsection "Study design", "Participants" and "Diagnostic material and tests" |
| Participants              | 6    | (a) Give the eligibility criteria, and the sources and methods of case ascertainment and control selection. Give the rationale for the choice of cases and controls | Given in "Methods", subsection "Study design" and "Participants"                                      |
|                           |      | (b) For matched studies, give matching criteria and the number of controls per case                                                                                 | NA                                                                                                    |
| Variables                 | 7    | Clearly define all outcomes, exposures, predictors, potential confounders, and effect modifiers. Give                                                               | Given in "Methods", subsection "Study design", "Participants" and "Diagnostic material and tests"     |

|                              |    |                                                                                                                                                                                      |                                                                           |
|------------------------------|----|--------------------------------------------------------------------------------------------------------------------------------------------------------------------------------------|---------------------------------------------------------------------------|
|                              |    | diagnostic criteria, if applicable                                                                                                                                                   |                                                                           |
| Data sources/<br>measurement | 8  | For each variable of interest, give sources of data and details of methods of assessment (measurement). Describe comparability of assessment methods if there is more than one group | Given in “Methods”, subsection “Diagnostic material and tests”            |
| Bias                         | 9  | Describe any efforts to address potential sources of bias                                                                                                                            | Described in “Methods”, subsection “Study design” and “Participants”      |
| Study size                   | 10 | Explain how the study size was arrived at                                                                                                                                            | Explained in “Methods”, subsection “Study design” and “Participants”      |
| Quantitative variables       | 11 | Explain how quantitative variables were handled in the analyses. If applicable, describe which groupings were chosen and why                                                         | Explained in “Methods”, subsection “Statistical analysis”                 |
| Statistical methods          | 12 | (a) Describe all statistical methods, including those used to control for confounding                                                                                                | Described in “Methods”, subsection “Statistical analysis”                 |
|                              |    | (b) Describe any methods used to examine subgroups and interactions                                                                                                                  | Described in “Methods”, subsection “Statistical analysis”                 |
|                              |    | (c) Explain how missing data were addressed                                                                                                                                          | NA                                                                        |
|                              |    | (d) If applicable, explain how matching of cases and controls was addressed                                                                                                          | NA                                                                        |
|                              |    | (e) Describe any sensitivity analyses                                                                                                                                                | NA                                                                        |
| <b>Results</b>               |    |                                                                                                                                                                                      |                                                                           |
| Participants                 | 13 | (a) Report numbers of individuals at each stage of study—eg numbers potentially eligible, examined for eligibility, confirmed eligible, included in the study,                       | Reported in “Results”, subsection “CAPA classification and ICU mortality” |

|                  |    |                                                                                                                                                                                                              |                                                                                                                                                     |
|------------------|----|--------------------------------------------------------------------------------------------------------------------------------------------------------------------------------------------------------------|-----------------------------------------------------------------------------------------------------------------------------------------------------|
|                  |    | completing follow-up, and analysed                                                                                                                                                                           |                                                                                                                                                     |
|                  |    | (b) Give reasons for non-participation at each stage                                                                                                                                                         | NA                                                                                                                                                  |
|                  |    | (c) Consider use of a flow diagram                                                                                                                                                                           | NA                                                                                                                                                  |
| Descriptive data | 14 | (a) Give characteristics of study participants (eg demographic, clinical, social) and information on exposures and potential confounders                                                                     | Given in “Table 1”                                                                                                                                  |
|                  |    | (b) Indicate number of participants with missing data for each variable of interest                                                                                                                          | Indicated in “Supplementary Table S1”                                                                                                               |
| Outcome data     | 15 | Report numbers in each exposure category, or summary measures of exposure                                                                                                                                    | Reported in “Tables 2” and “Table 3”                                                                                                                |
| Main results     | 16 | (a) Give unadjusted estimates and, if applicable, confounder-adjusted estimates and their precision (eg, 95% confidence interval). Make clear which confounders were adjusted for and why they were included | Given in “Results”, “Table 1” and “Table 3”                                                                                                         |
|                  |    | (b) Report category boundaries when continuous variables were categorized                                                                                                                                    | NA                                                                                                                                                  |
|                  |    | (c) If relevant, consider translating estimates of relative risk into absolute risk for a meaningful time period                                                                                             | NA                                                                                                                                                  |
| Other analyses   | 17 | Report other analyses done—eg analyses of subgroups and interactions, and sensitivity analyses                                                                                                               | Reported in “Results”, subsection “BAL GM and ICU mortality”, “Serum fungal markers and ICU mortality” and “Antifungal treatment and ICU mortality” |

## Discussion

|                          |    |                                                                                                                                                                            |                                                         |
|--------------------------|----|----------------------------------------------------------------------------------------------------------------------------------------------------------------------------|---------------------------------------------------------|
| Key results              | 18 | Summarise key results with reference to study objectives                                                                                                                   | Summarised in “Discussion” paragraph 1                  |
| Limitations              | 19 | Discuss limitations of the study, taking into account sources of potential bias or imprecision. Discuss both direction and magnitude of any potential bias                 | Discussed in “Discussion” paragraph 2 and 3             |
| Interpretation           | 20 | Give a cautious overall interpretation of results considering objectives, limitations, multiplicity of analyses, results from similar studies, and other relevant evidence | Given in “Discussion” paragraph 4                       |
| Generalisability         | 21 | Discuss the generalisability (external validity) of the study results                                                                                                      |                                                         |
| <b>Other information</b> |    |                                                                                                                                                                            |                                                         |
| Funding                  | 22 | Give the source of funding and the role of the funders for the present study and, if applicable, for the original study on which the present article is based              | Given in “Funding” and “Potential conflict of interest” |
