# Supplementary material
Source: PubMed Central journal article supplement (PMC8601217)

# Supplementary Figure S1: Flowchart

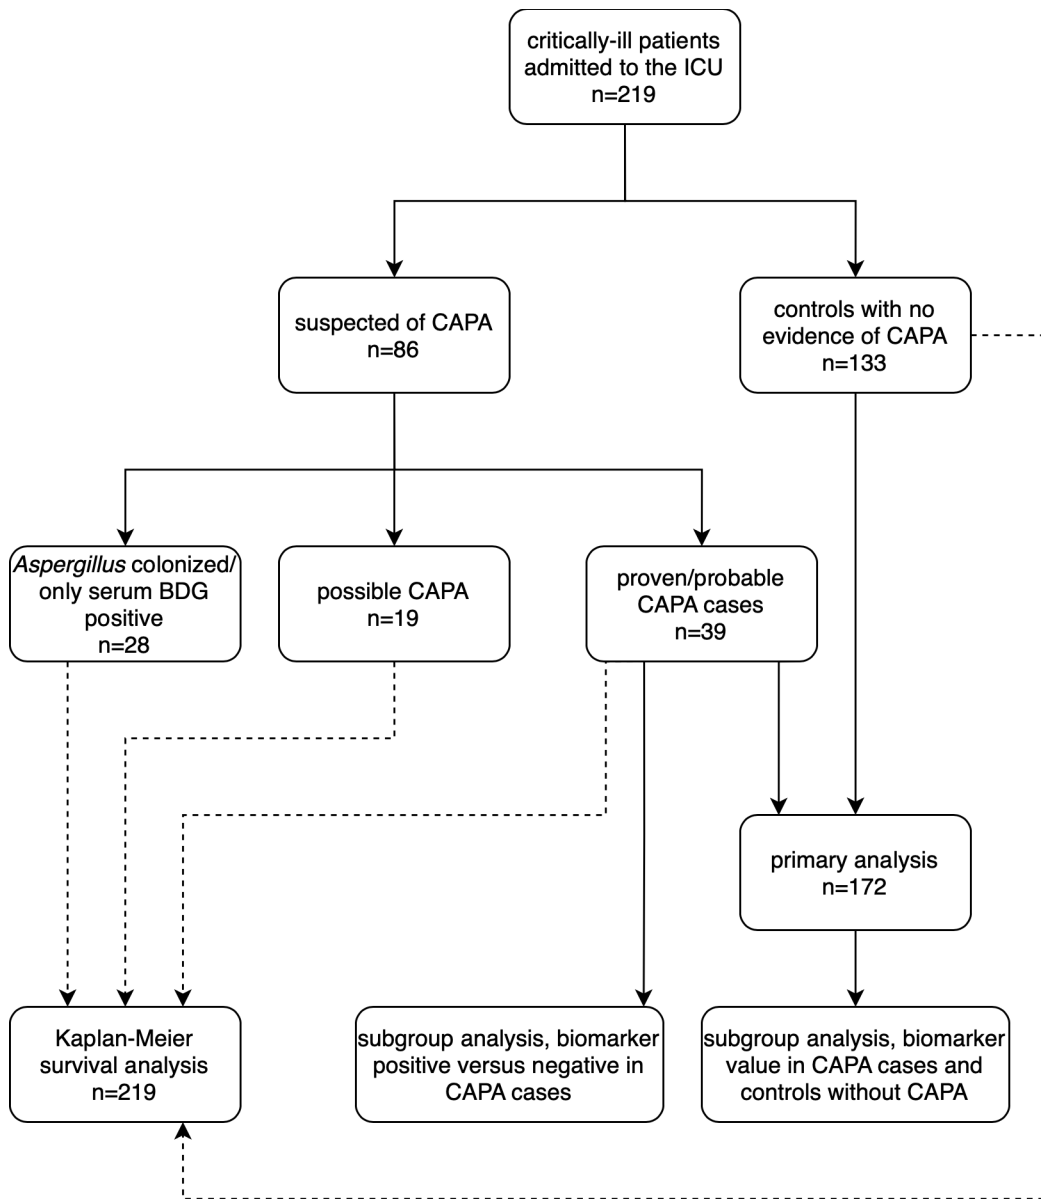

Supplement: jcm.01229-21-s0004.pdf [file jcm.01229-21-s0004.pdf]
